# Supplementary material for: Nanobead-on-string composites for tendon tissue engineering
Source: Royal Society of Chemistry journal article supplement (doi:10.1039/c8tb00246k), 2018-01-01
Supplement: c8tb00246k1.pdf [file c8tb00246k1.pdf]

## Supplementary information

### Nanobeads-on-string composites for tendon tissue engineering

Chiara Rinoldi<sup>a</sup>, Ewa Kijeńska<sup>a</sup>, Adrian Chlanda<sup>a</sup>, Emilia Choinska<sup>a</sup>, Nabyl Khenoussi<sup>b</sup>, Ali Tamayol<sup>c,d,e,f</sup>, Ali Khademhosseini<sup>c,d,e,g,h</sup>, Wojciech Swieszkowski<sup>a\*</sup>

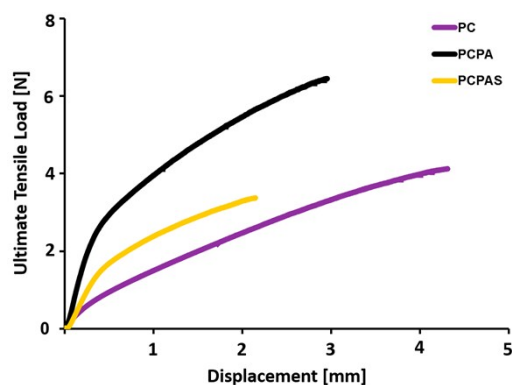

**Figure S1.** Mechanical properties of electrospun scaffolds: load-displacement curves. ( $n=5$ )

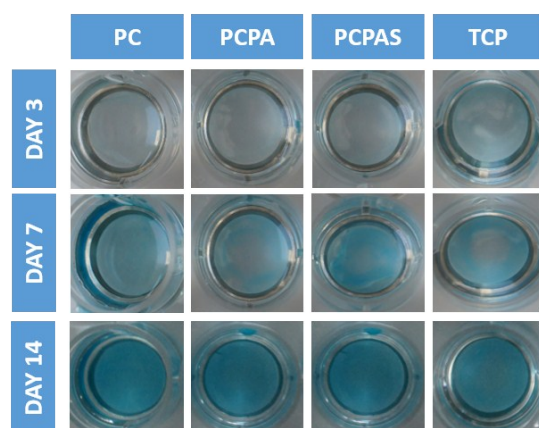

**Figure S2.** GAG deposition by L929 fibroblasts cultured on electrospun structures and TCP: Alcian Blue staining performed after 3, 7 and 14 days of culture. ( $n=3$ )

| Material | Fiber dimension [nm] | Contact angle [°] | Elastic modulus [MPa] | Ultimate Tensile Stress [MPa] | Ultimate Strain [%] |
|----------|----------------------|-------------------|-----------------------|-------------------------------|---------------------|
| PC       | 139 ± 13             | 139.8 ± 1.4       | 2.5 ± 0.5             | 10.3 ± 1.0                    | 83.3 ± 8.5          |
| PCPA     | 126 ± 14             | 133.2 ± 2.8       | 4.7 ± 0.8             | 15.6 ± 0.6                    | 55.4 ± 6.3          |
| PCPAS    | 136 ± 17             | 126.1 ± 1.9       | 41.0 ± 3.9            | 8.1 ± 0.9                     | 40.6 ± 4.7          |

**Table S1.** Morphological, mechanical and surface properties of PC, PCPA and PCPAS nanofibrous scaffolds.
